# Supplementary material
Source: MDPI journal article supplement (https://www.mdpi.com/2072-4292/13/21/4229)
Supplement: s1 [file s1]

*Supplementary Materials for*

**Estimating Gross Primary Productivity (GPP) over rice–wheat-rotation croplands by using Random Forest model and Eddy Covariance Measurements: upscaling and comparison with MODIS Product**

Zexia Duan <sup>1</sup>, Yuanjian Yang <sup>1\*</sup>, Shaohui Zhou <sup>1</sup>, Zhiqiu Gao <sup>1,2</sup>, Lian Zong <sup>1</sup>, Sihui Fan<sup>3</sup>, Jian Yin<sup>1</sup>

1    Climate and Weather Disasters Collaborative Innovation Center, Key Laboratory for Aerosol-Cloud-Precipitation of China Meteorological Administration, School of Atmospheric Physics, Nanjing University of Information Science and Technology, Nanjing, 210044, China ;

2    State Key Laboratory of Atmospheric Boundary Layer Physics and Atmospheric Chemistry, Institute of Atmospheric Physics, Chinese Academy of Sciences, Beijing, 100029, China;

3    Ningbo Meteorological Bureau, Ningbo, 315000, China.

\*    Correspondence: Dr. Yuanjian Yang, yyj1985@nuist.edu.cn

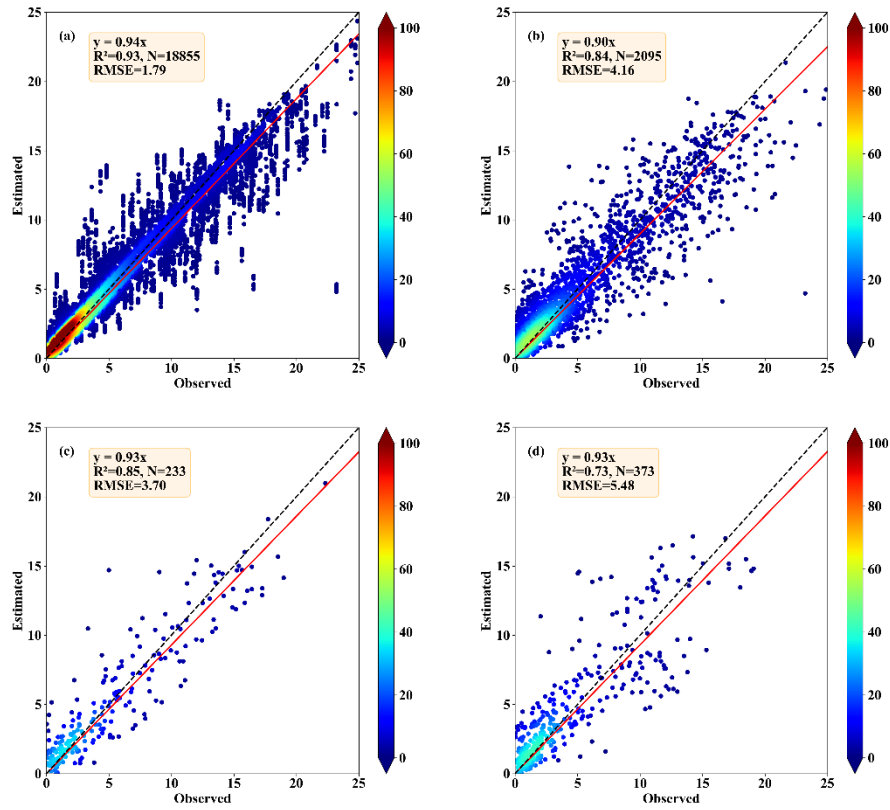

**Figure S1.** Scatter density plots results for the support vector machine model in predicting gross primary productivity in the (a) 10-fold cross-validation training set, (b) 10-fold cross-validation testing set, (c) validation by the rest samples at Shouxian and Dongtai sites, and (d) validation by all samples at Dafeng site.

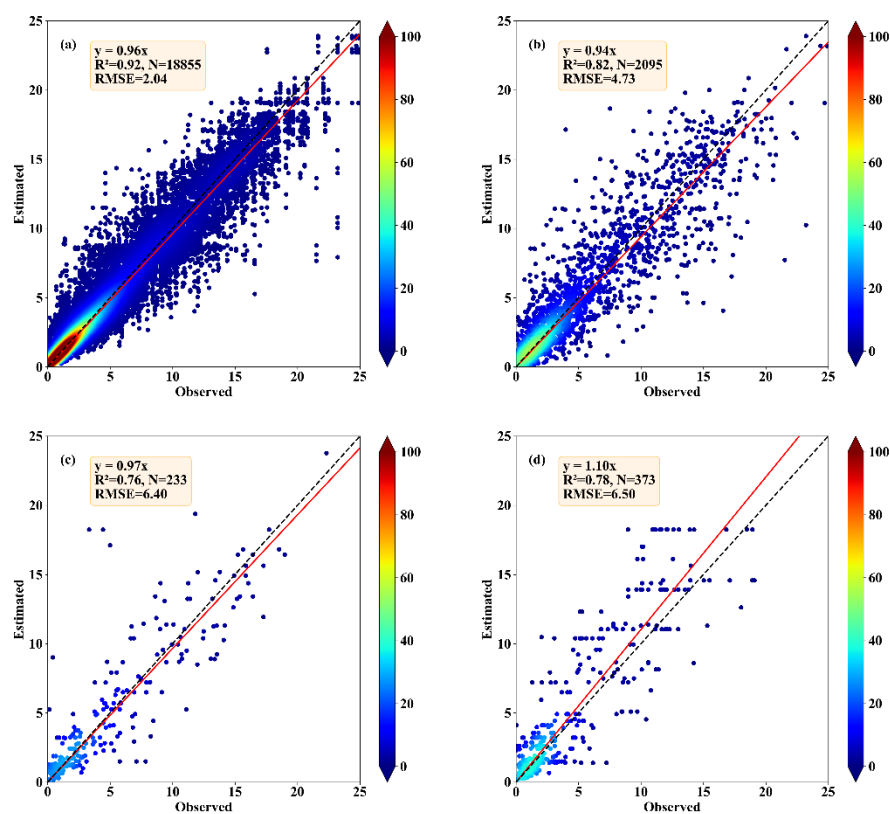

**Figure S2.** Scatter density plots results for the Decision Tree Regression model in predicting gross primary productivity in the (a) 10-fold cross-validation training set, (b) 10-fold cross-validation testing set, (c) validation by the rest samples at Shouxian and Dongtai sites, and (d) validation by all samples at Dafeng site.

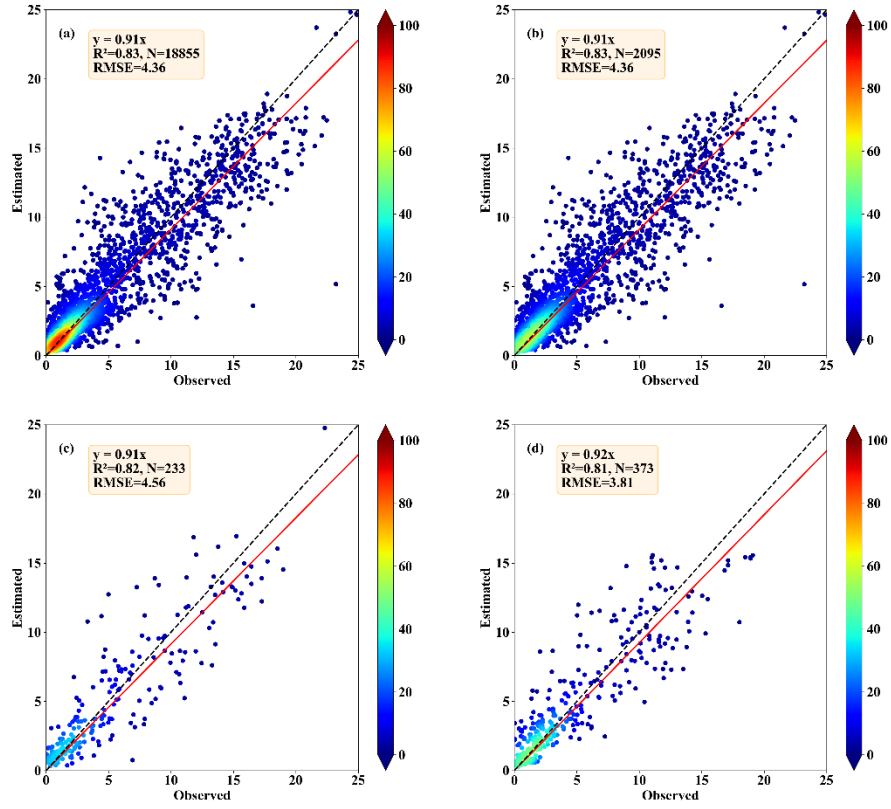

**Figure S3.** Scatter density plots results for the deep belief network model in predicting gross primary productivity in the **(a)** 10-fold cross-validation training set, **(b)** 10-fold cross-validation testing set, **(c)** validation by the rest samples at Shouxian and Dongtai sites, and **(d)** validation by all samples at Dafeng site.

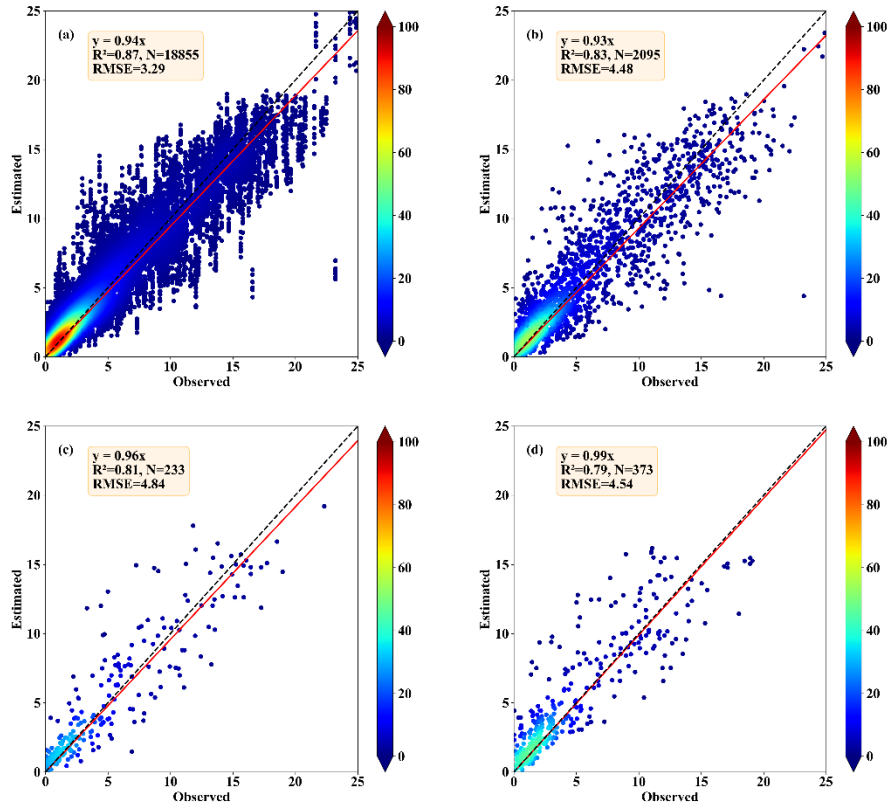

**Figure S4.** Scatter density plots results for the artificial neural network model in predicting gross primary productivity in the **(a)** 10-fold cross-validation training set, **(b)** 10-fold cross-validation testing set, **(c)** validation by the rest samples at Shouxian and Dongtai sites, and **(d)** validation by all samples at Dafeng site.
